# Supplementary material for: Synthesis and Molecular Docking Studies of Novel Biheterocyclic Propanamides as Antidiabetic Agents Having Mild Cytotoxicity
Source: PubMed Central journal article supplement — ACS Omega. 2023 Jun 14;8(25):22899–911. doi: 10.1021/acsomega.3c01882 (PMC10312992; doi:10.1021/acsomega.3c01882), 2023-06-14
Supplement: ao3c01882_si_001.pdf [file ao3c01882_si_001.pdf]

## Supplementary data

### Synthesis and Molecular Docking Studies of Novel Bi-heterocyclic Propanamides as Anti-diabetic Agents having Mild Cytotoxicity

Muhammad Athar Abbasi<sup>1\*</sup>, Kaniz Rubab<sup>1</sup>, Aziz-ur-Rehman<sup>1</sup>, Sabahat Zahra Siddiqui<sup>1</sup>, Mubashir Hassan<sup>2</sup>, Hussain Raza<sup>3</sup>, Syed Adnan Ali Shah<sup>4,5</sup>, Muhammad Shahid<sup>6</sup>, Andrzej Kloczkowski<sup>2,7</sup>

<sup>1</sup>Department of Chemistry, Government College University, Lahore-54000, Pakistan.

<sup>2</sup>The Steve and Cindy Rasmussen Institute for Genomic Medicine, Nationwide Children Hospital, Columbus, Ohio 43205, USA.

<sup>3</sup>College of Natural Sciences, Department of Biological Sciences, Kongju National University, Gongju-32558, South Korea.

<sup>4</sup>Faculty of Pharmacy, Universiti Teknologi MARA Cawangan Selangor Kampus Puncak Alam, Bandar Puncak Alam, 42300 Selangor, Malaysia.

<sup>5</sup>Atta-ur-Rahman Institute for Natural Product Discovery (AuRIns), Universiti Teknologi MARA Cawangan Selangor Kampus Puncak Alam, Bandar Puncak Alam, 42300 Selangor, Malaysia.

<sup>6</sup>Department of Biochemistry, University of Agriculture, Faisalabad-38040, Pakistan.

<sup>7</sup>Department of Pediatrics, The Ohio State University, Columbus, Ohio 43205, USA.

---

**\*Corresponding Author:**

Prof. Dr. Muhammad Athar Abbasi, E-mail: [abbasi@gcu.edu.pk](mailto:abbasi@gcu.edu.pk) Tel: (+92)-42-111000010 Ext. 266.

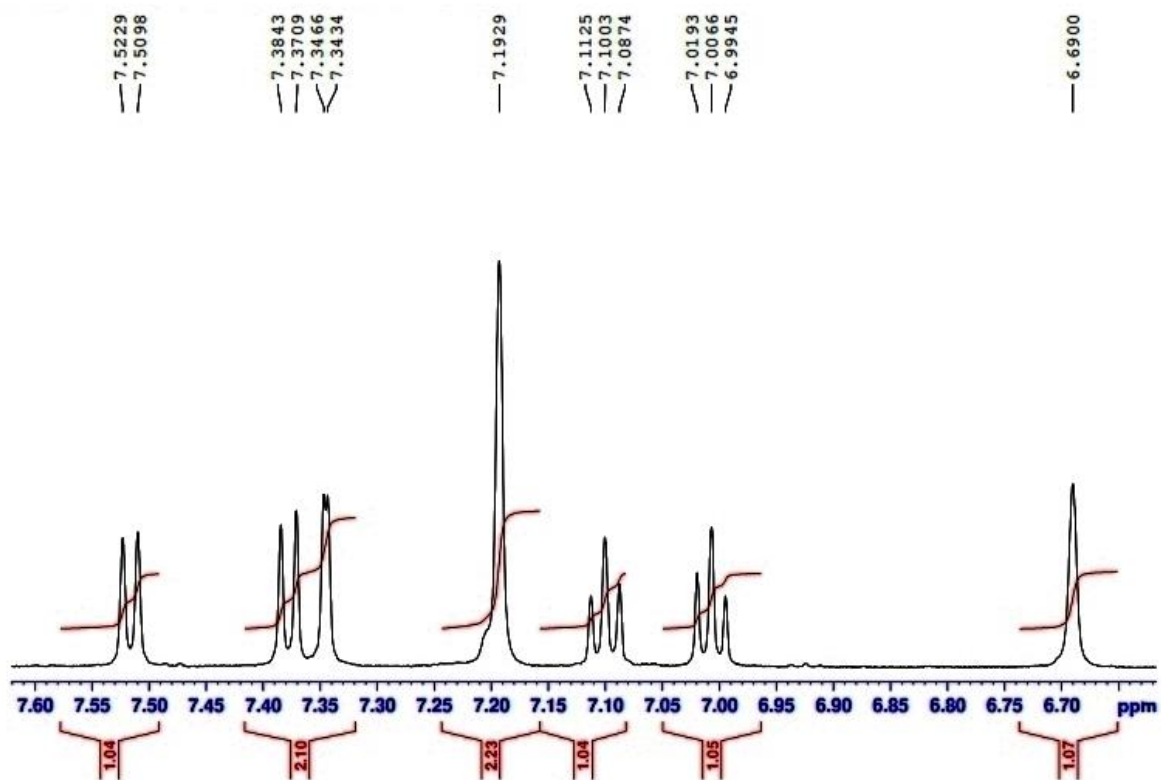

**Figure S1:** Aromatic region of  $^1\text{H-NMR}$  spectrum of **8r**.

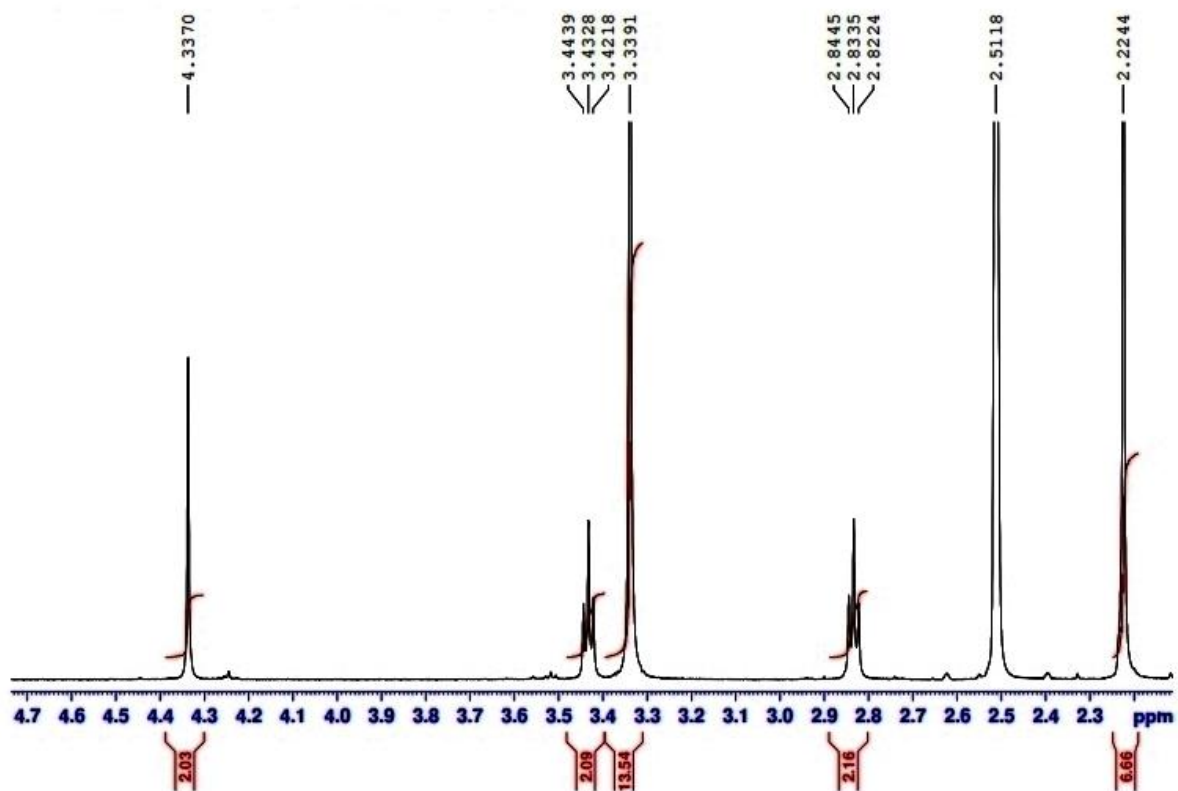

Figure S2: Aliphatic region of  $^1\text{H-NMR}$  spectrum of **8r**.

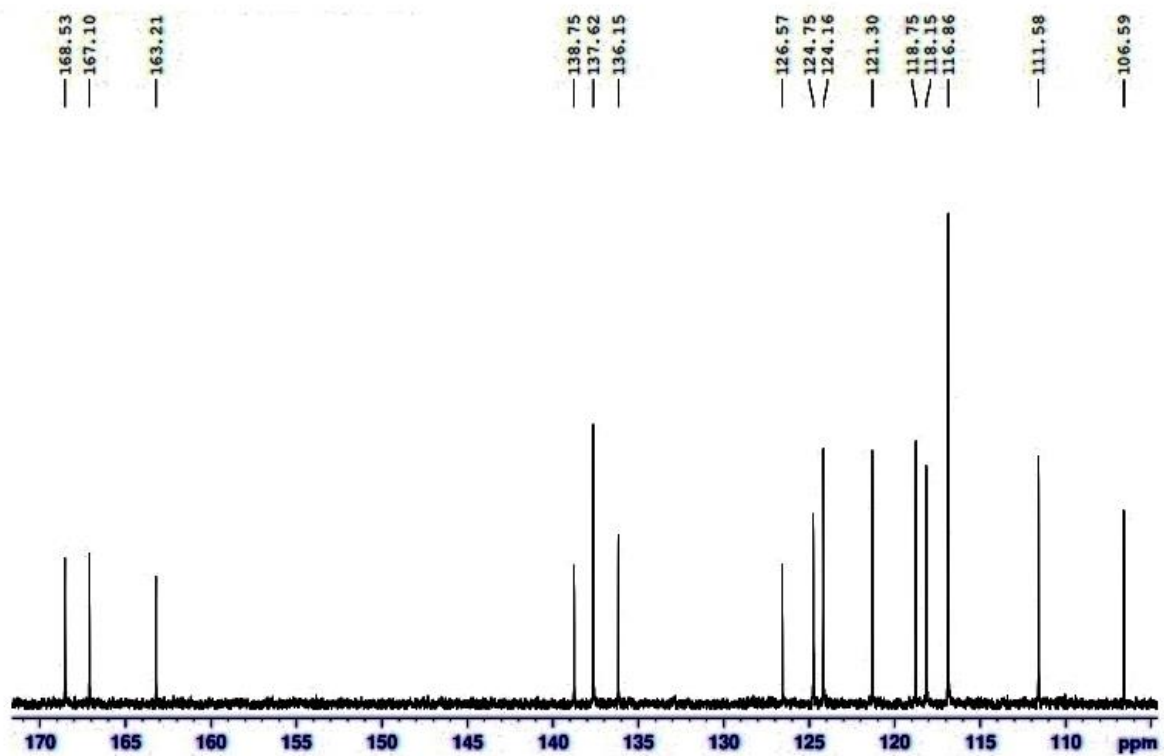

**Figure S3:** Downfield region of  $^{13}\text{C}$ -NMR spectrum of **8r**.

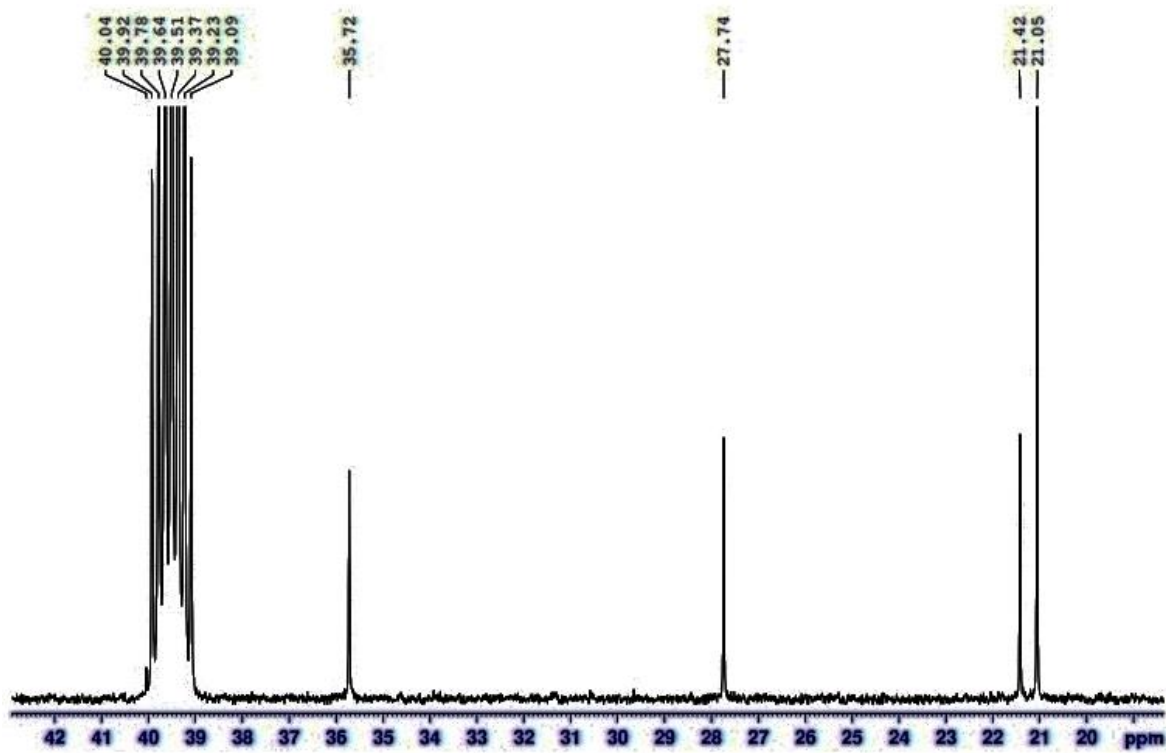

**Figure S4:** Upfield region of  $^{13}\text{C}$ -NMR spectrum of **8r**.

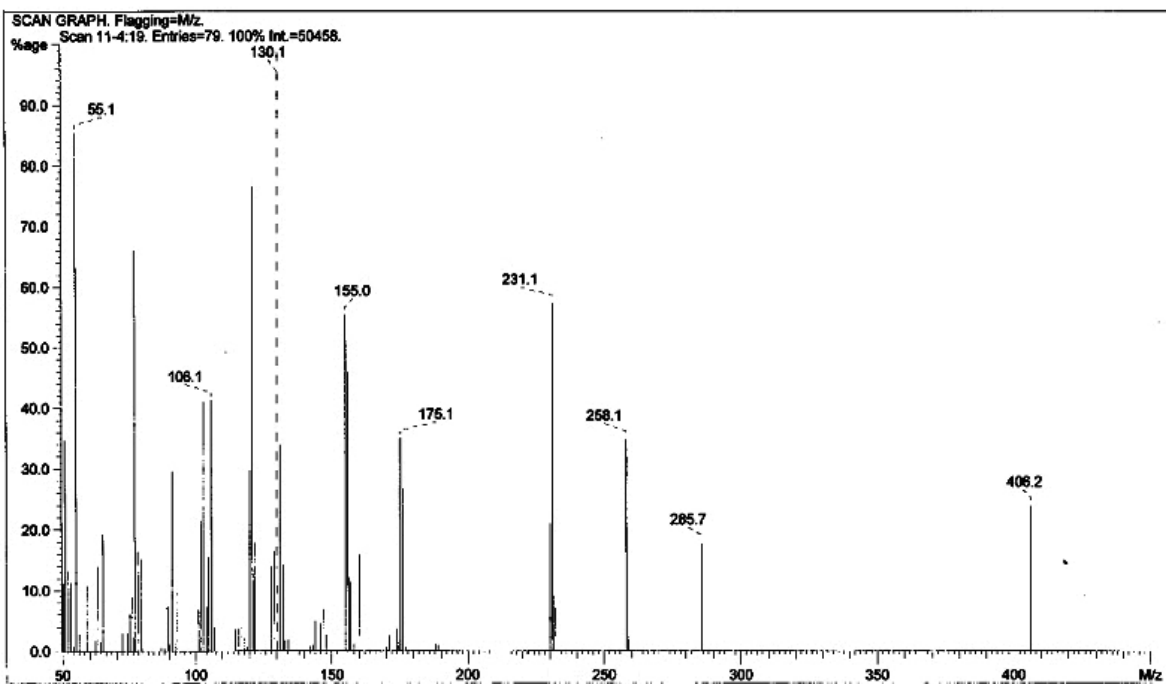

Figure S5: EI-MS spectrum of **8r**.

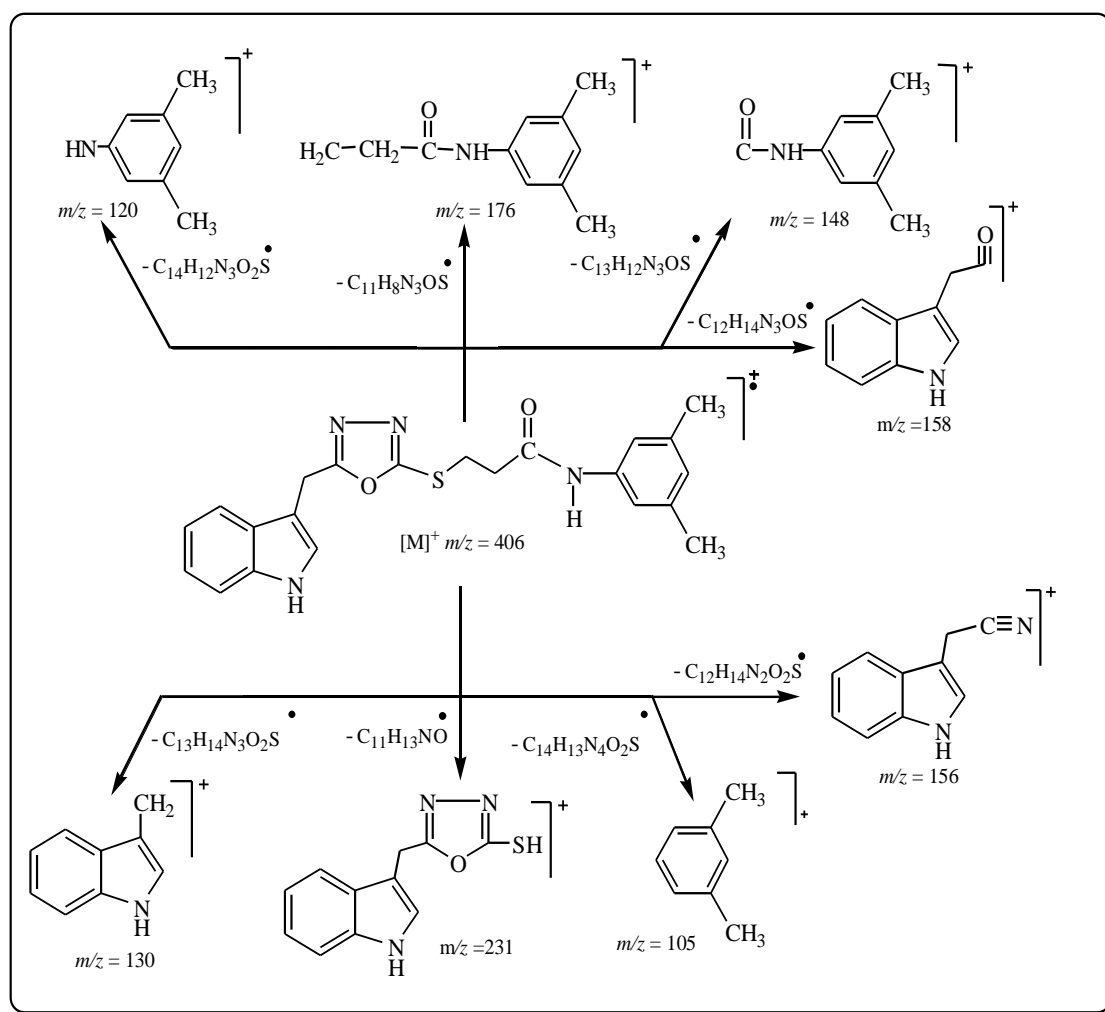

**Figure S6:** Fragmentation pattern of **8r**.

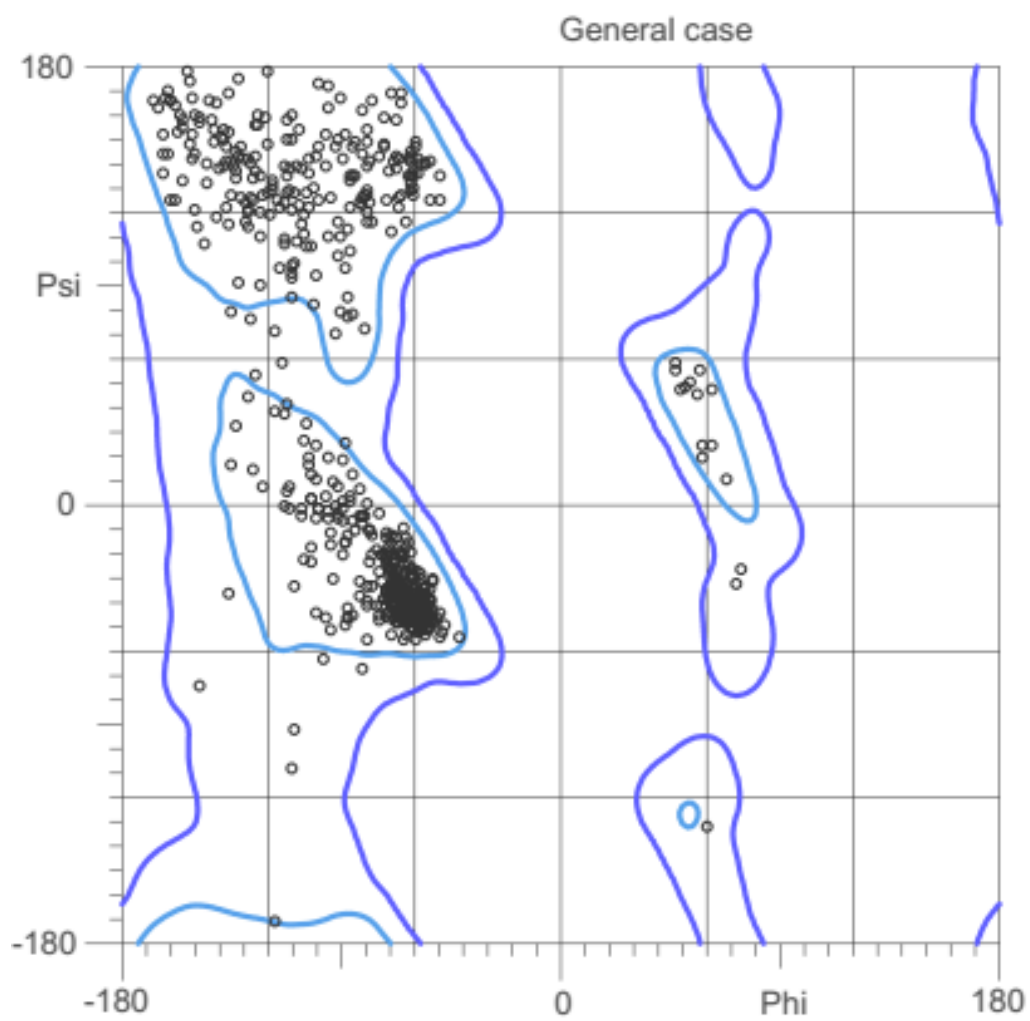

**Figure S7:** Ramachandran graph.



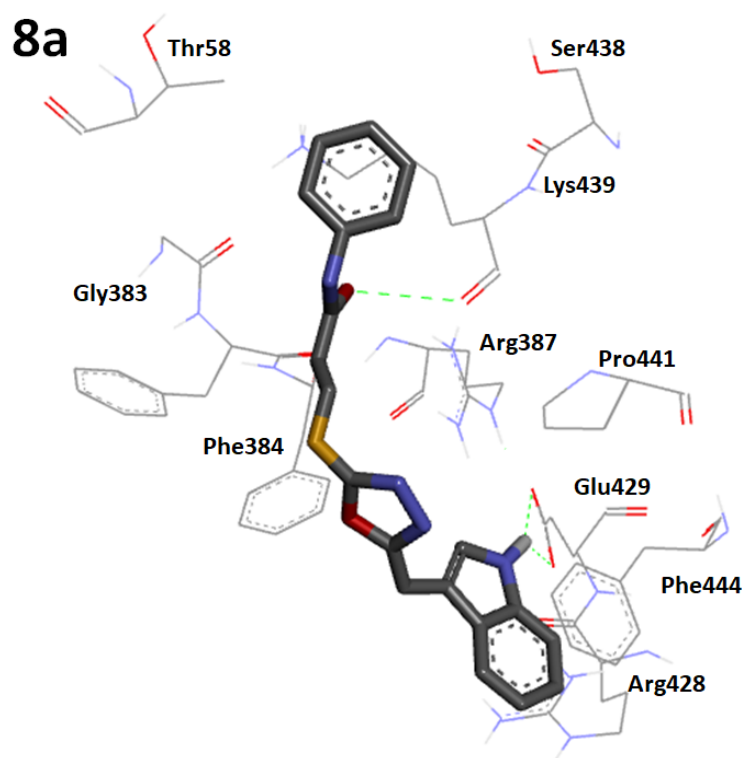

**Figure S8:** Docking of **8a** with  $\alpha$ -glucosidase.

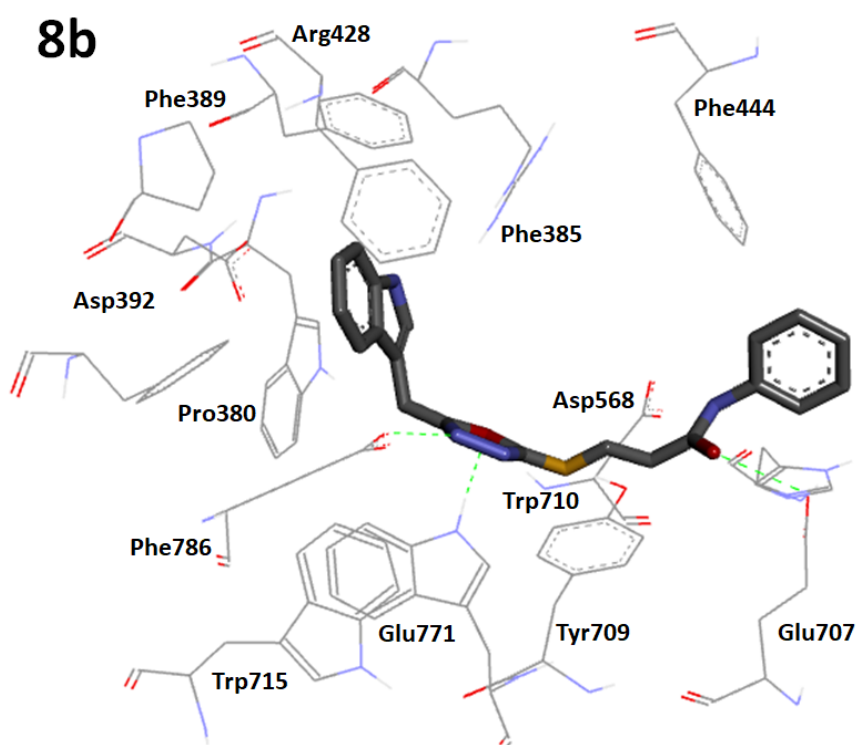

**Figure S9:** Docking of **8b** with  $\alpha$ -glucosidase.

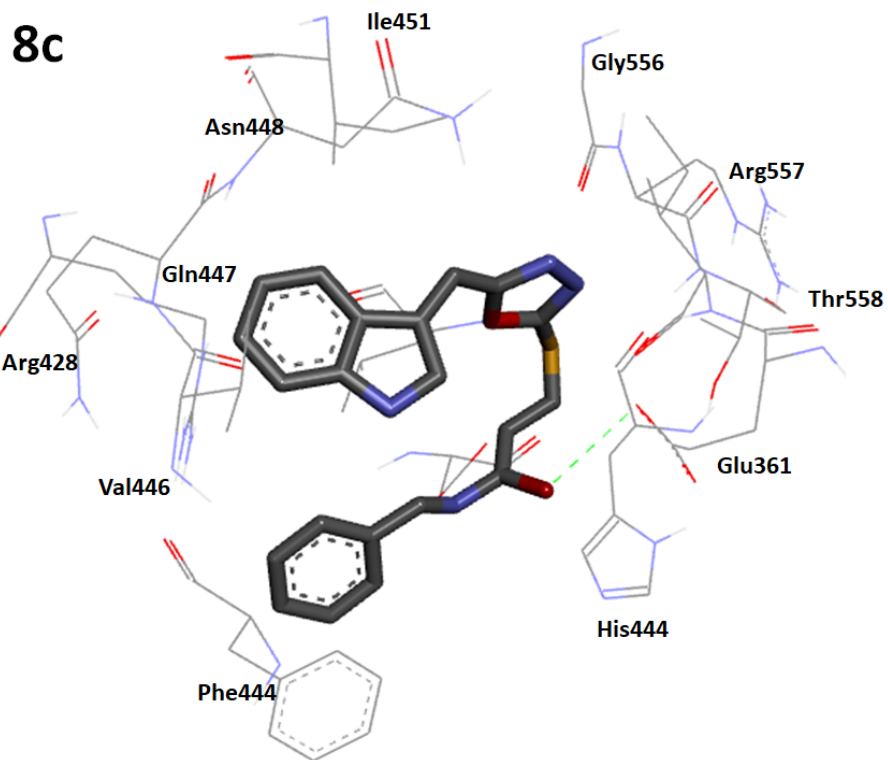

**Figure S10:** Docking of **8c** with  $\alpha$ -glucosidase.

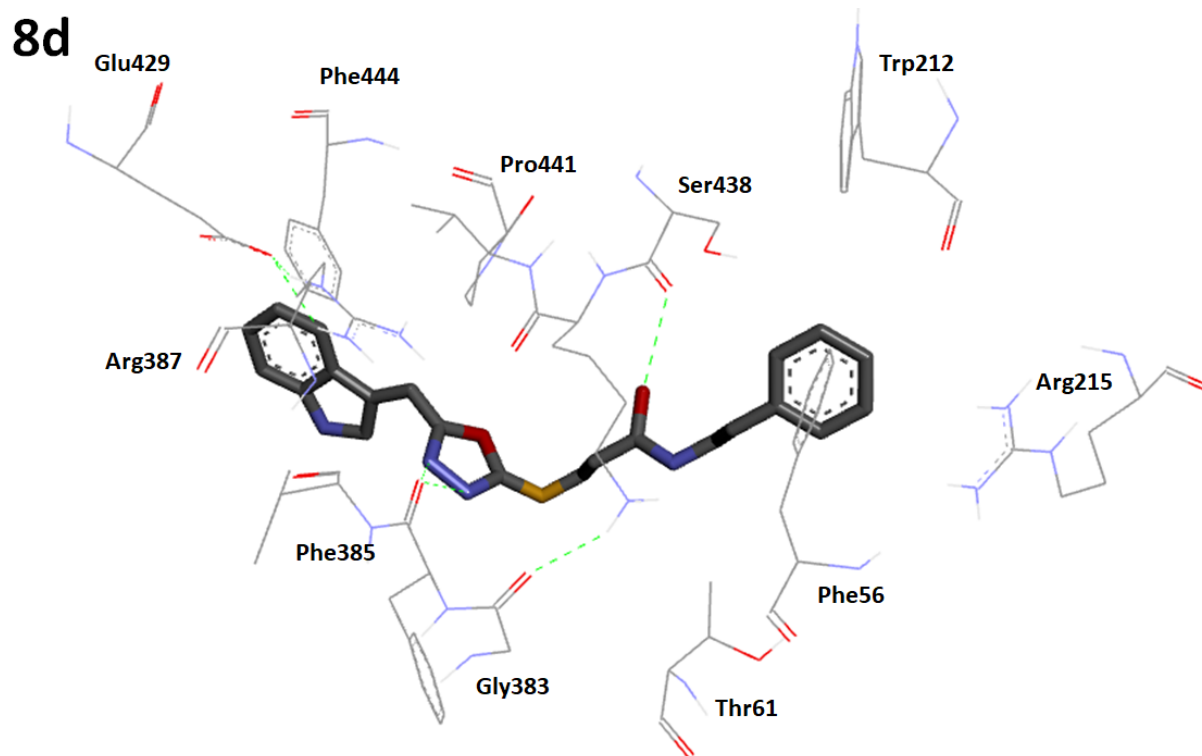

**Figure S11:** Docking of **8d** with  $\alpha$ -glucosidase.

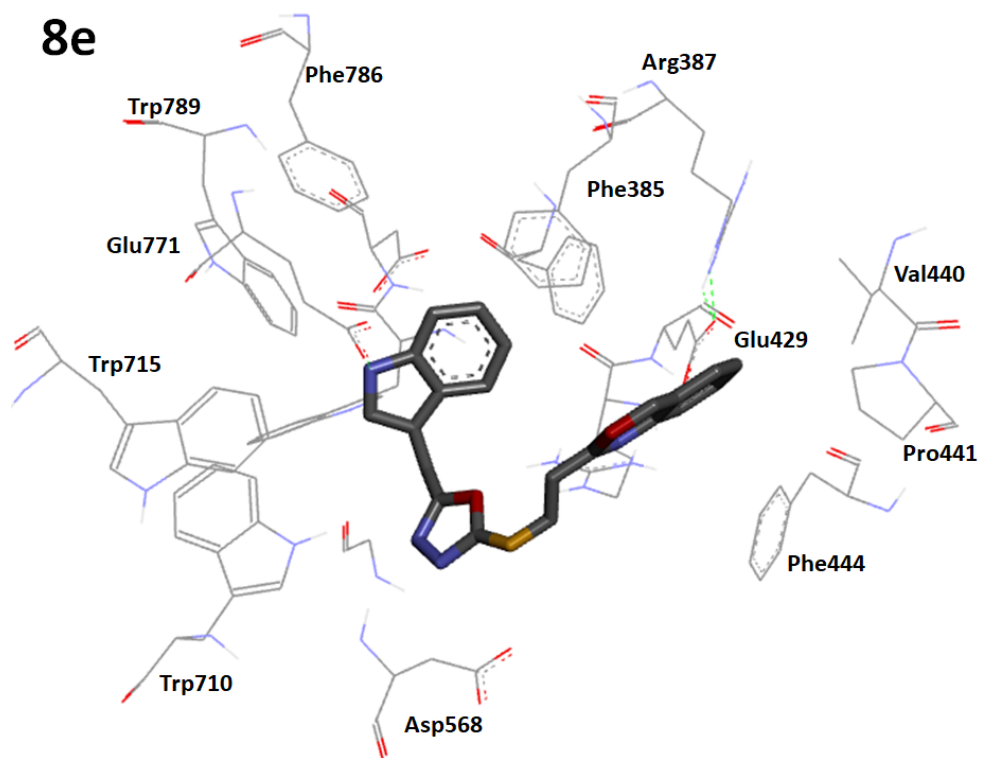

**Figure S12:** Docking of **8e** with  $\alpha$ -glucosidase.

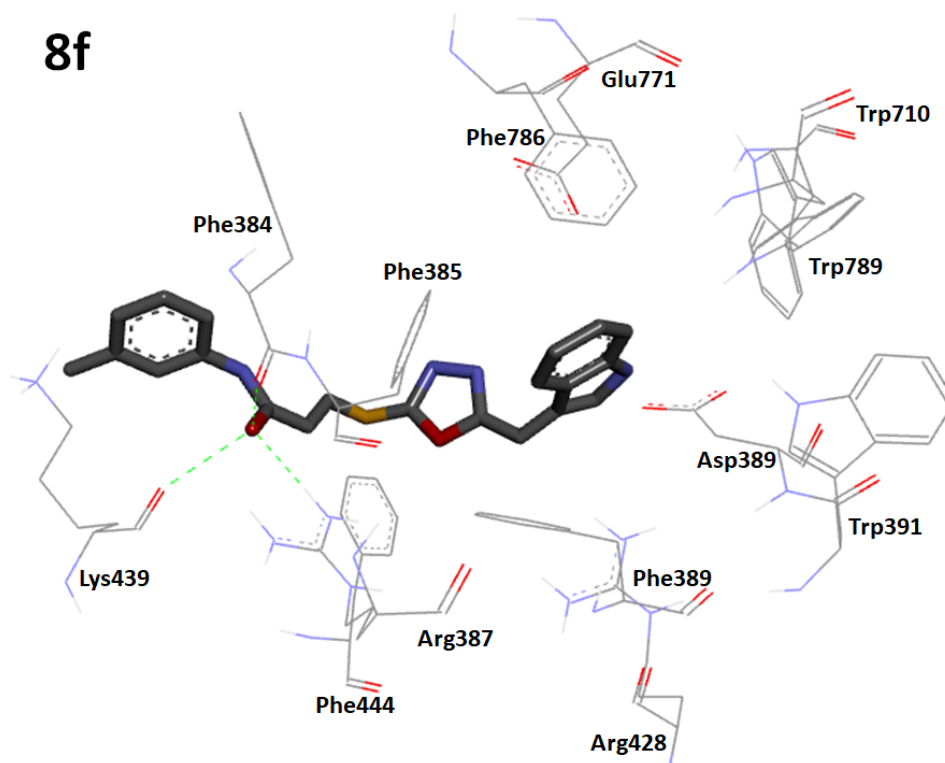

**Figure S13:** Docking of **8f** with  $\alpha$ -glucosidase.

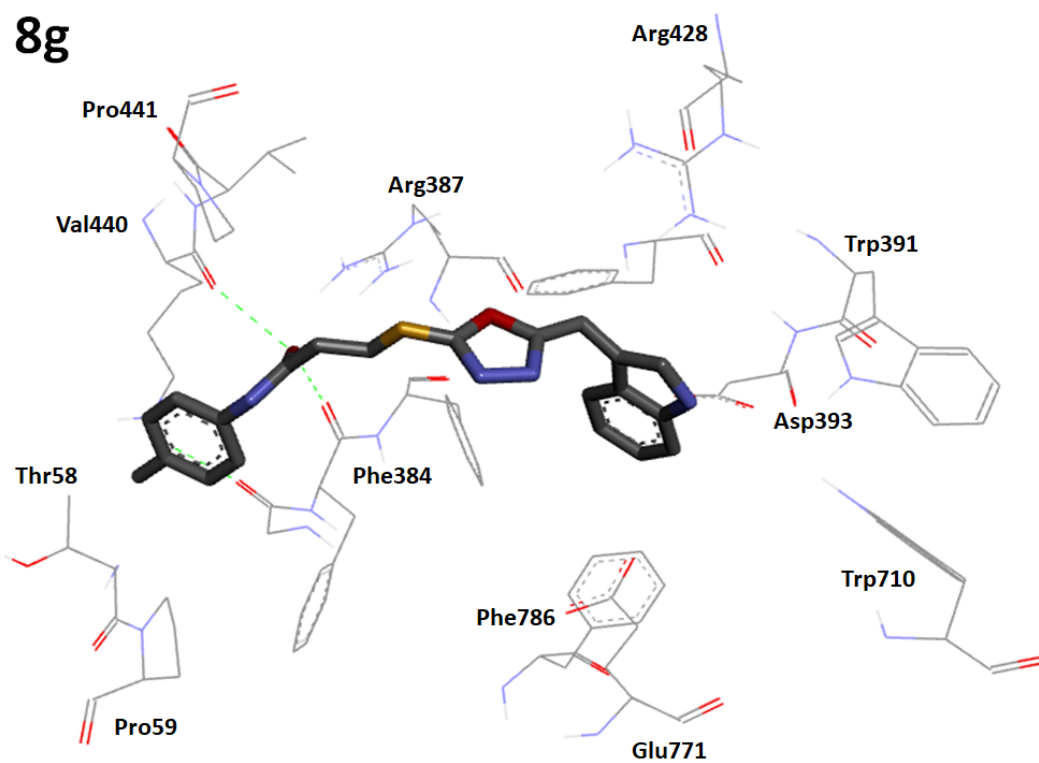

**Figure S14:** Docking of **8g** with  $\alpha$ -glucosidase.

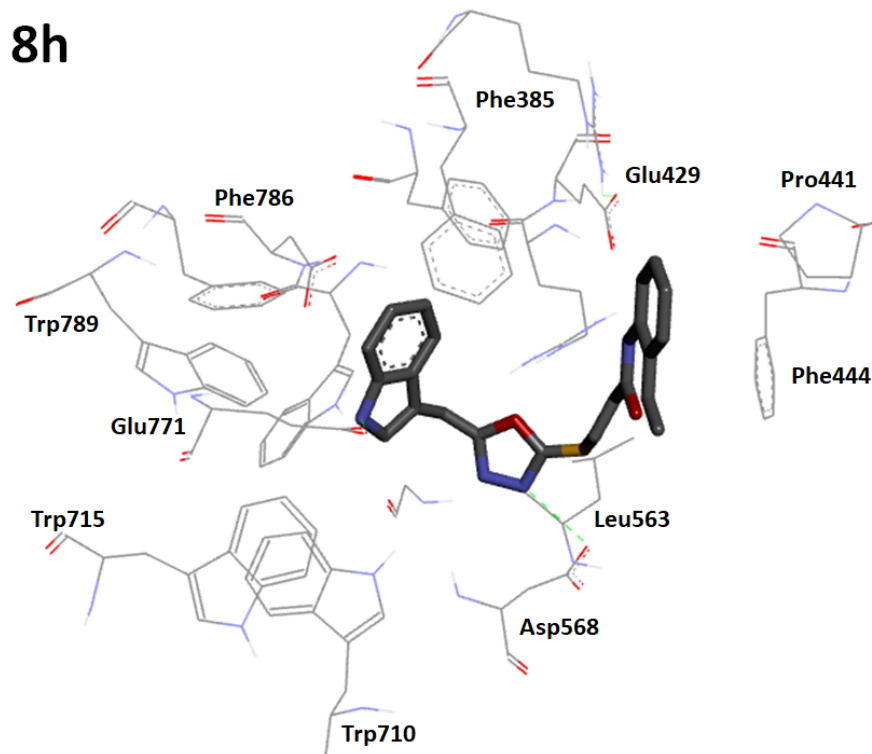

**Figure S15:** Docking of **8h** with  $\alpha$ -glucosidase.

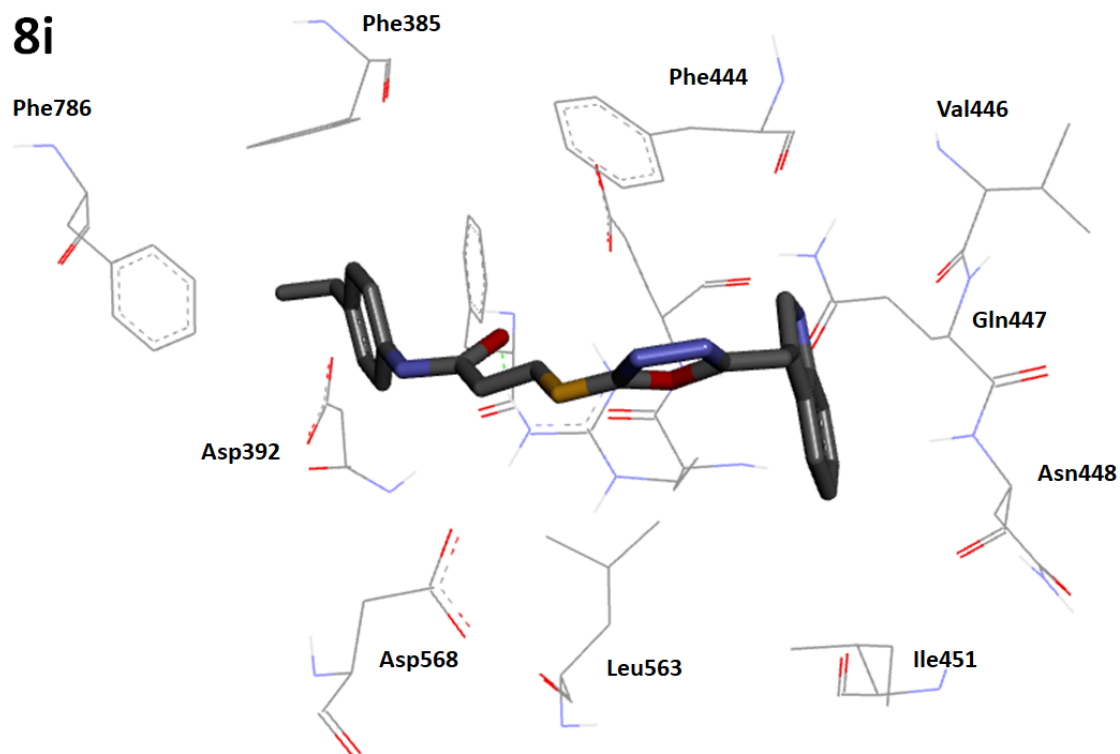

**Figure S16:** Docking of **8i** with  $\alpha$ -glucosidase.

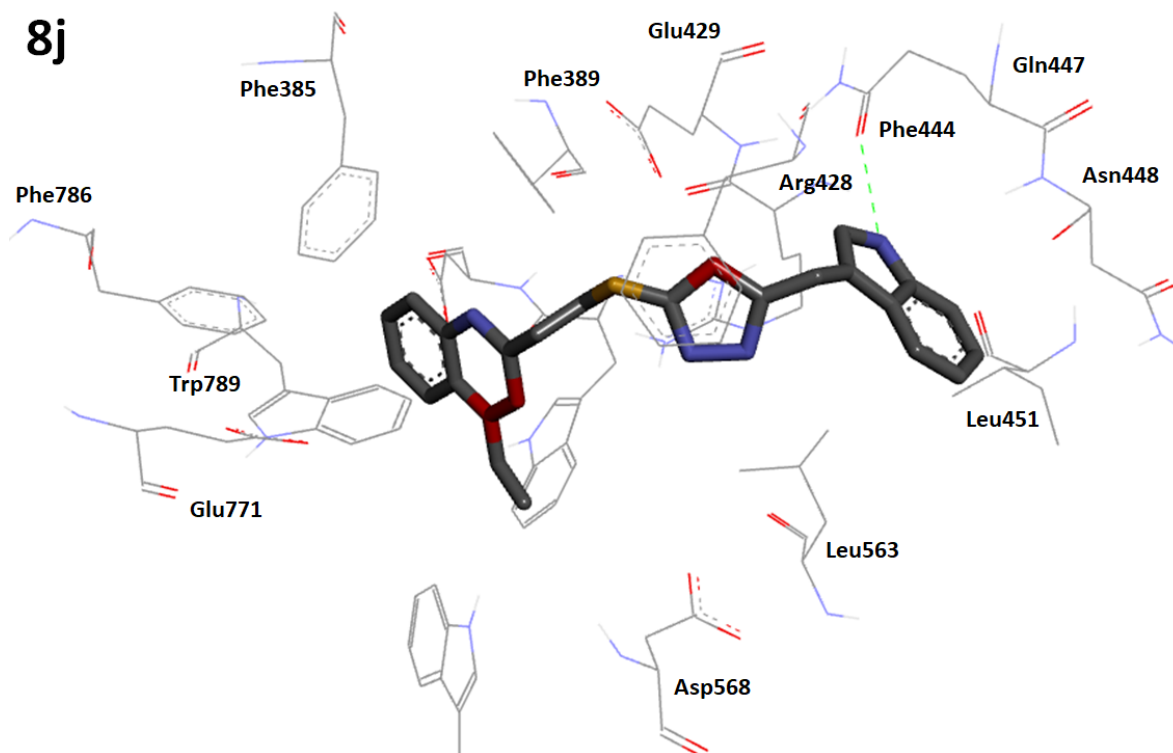

**Figure S17:** Docking of **8j** with  $\alpha$ -glucosidase.

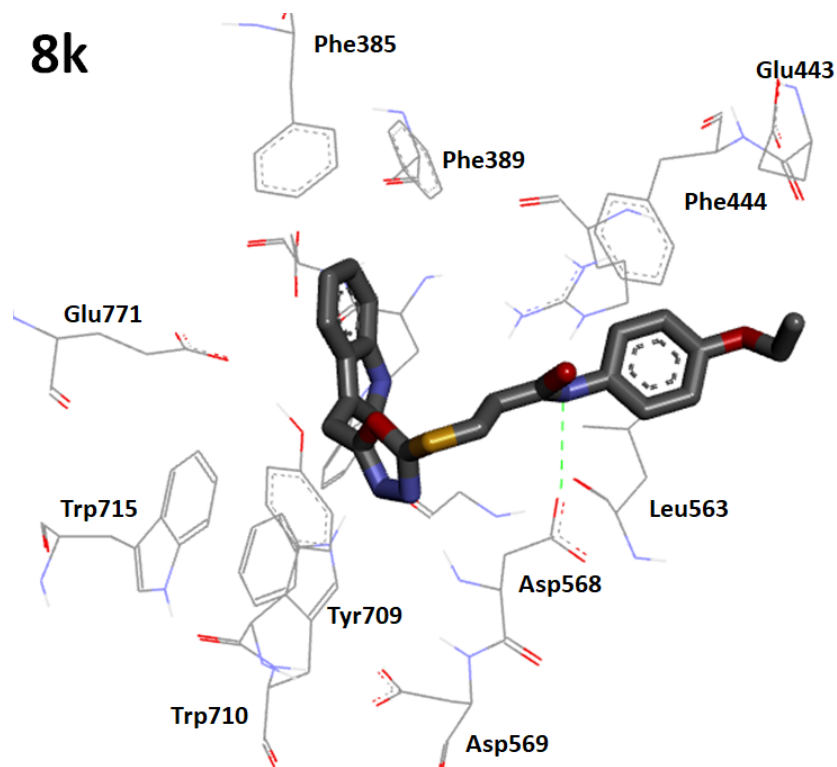

**Figure S18:** Docking of **8k** with  $\alpha$ -glucosidase.

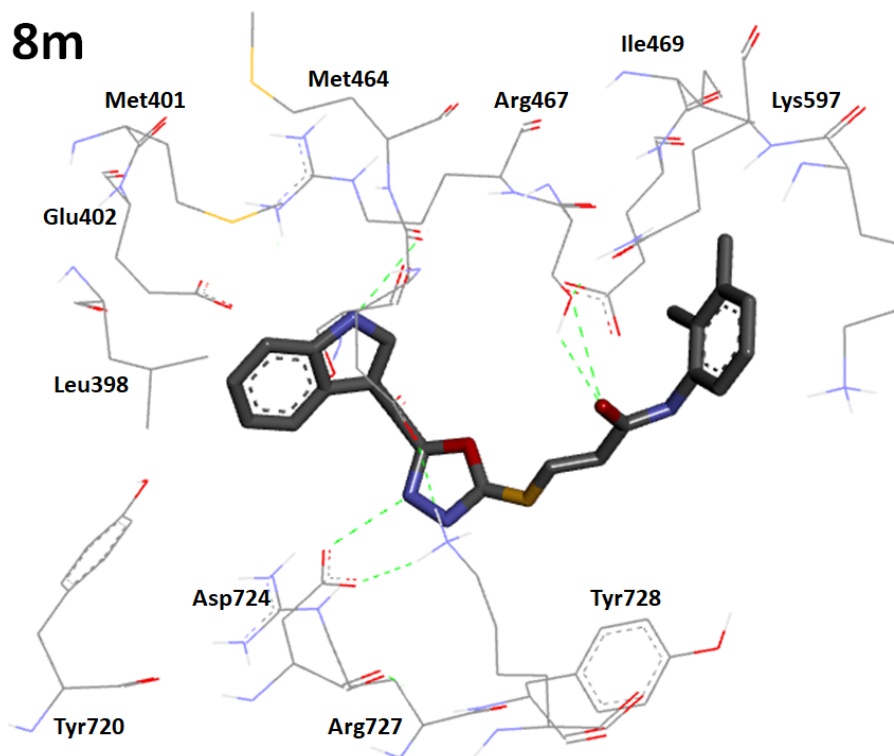

**Figure S19:** Docking of **8m** with  $\alpha$ -glucosidase.

**8n**

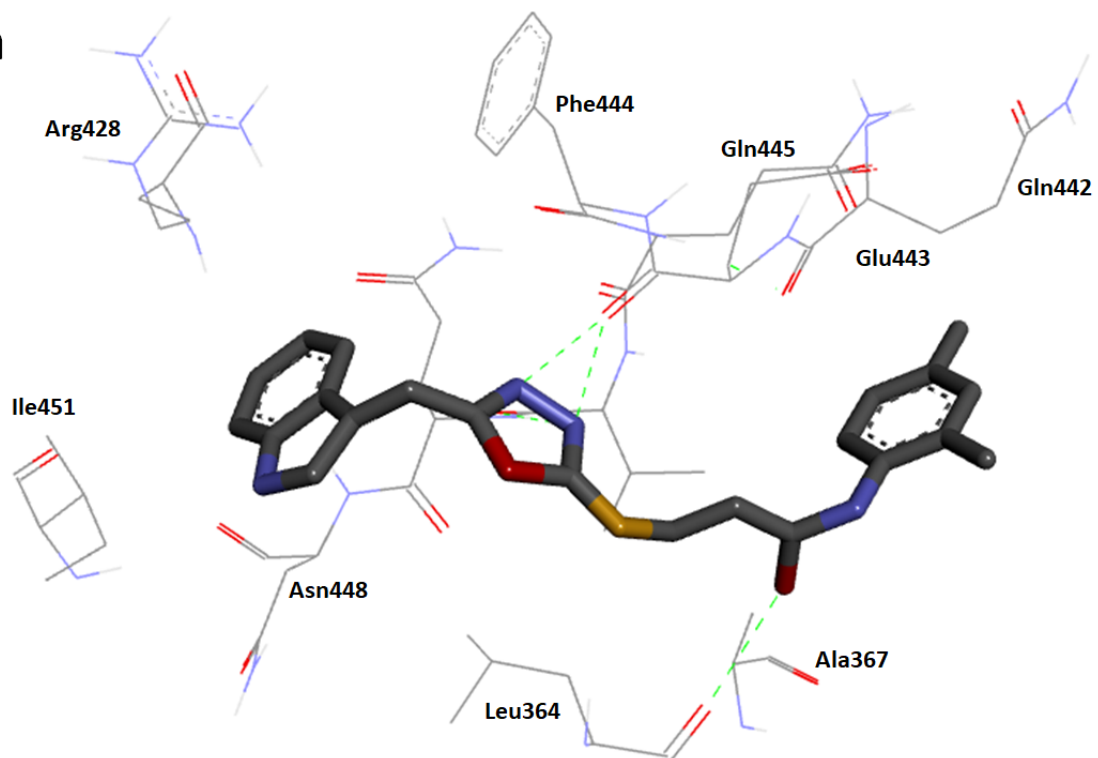

**Figure S20:** Docking of **8n** with  $\alpha$ -glucosidase.

**8o**

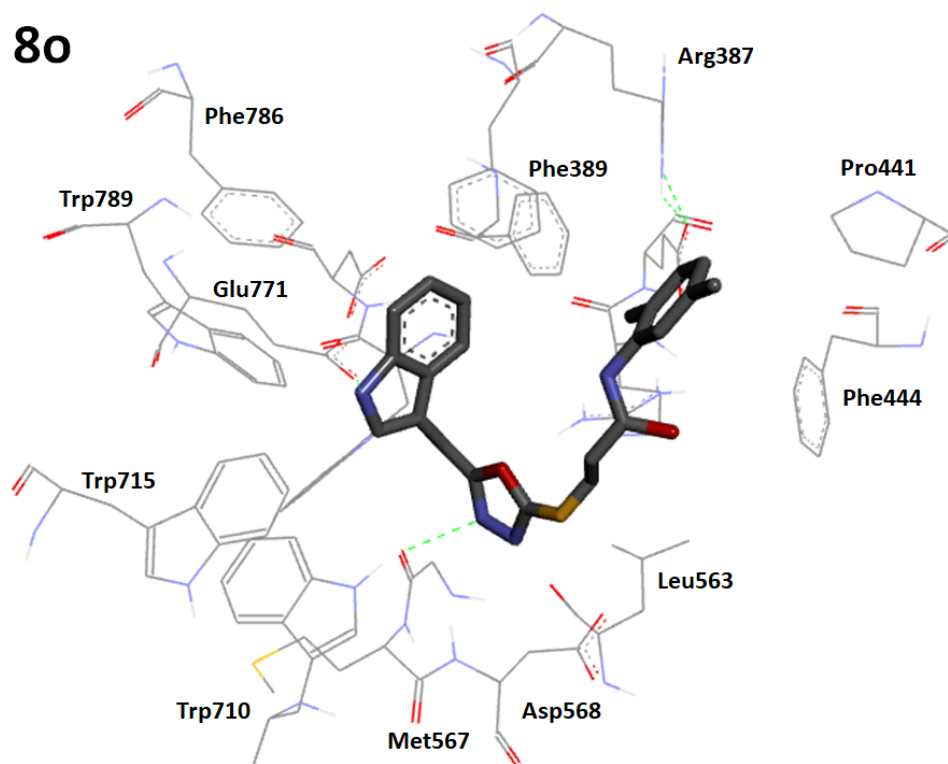

**Figure S21:** Docking of **8o** with  $\alpha$ -glucosidase.

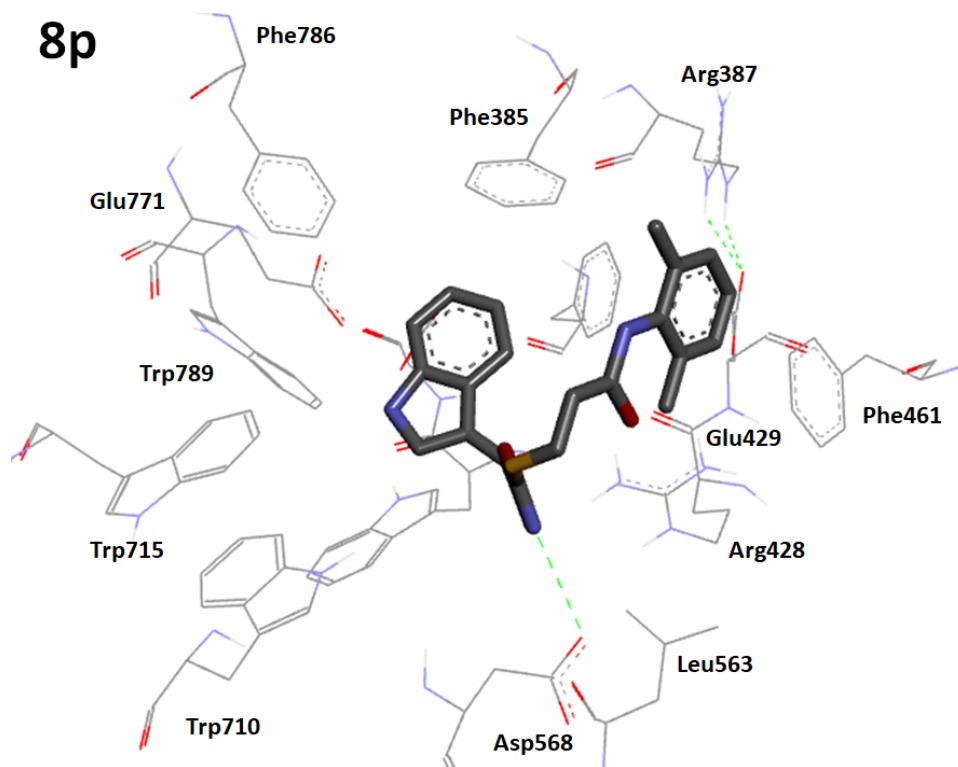

**Figure S22:** Docking of **8p** with  $\alpha$ -glucosidase.

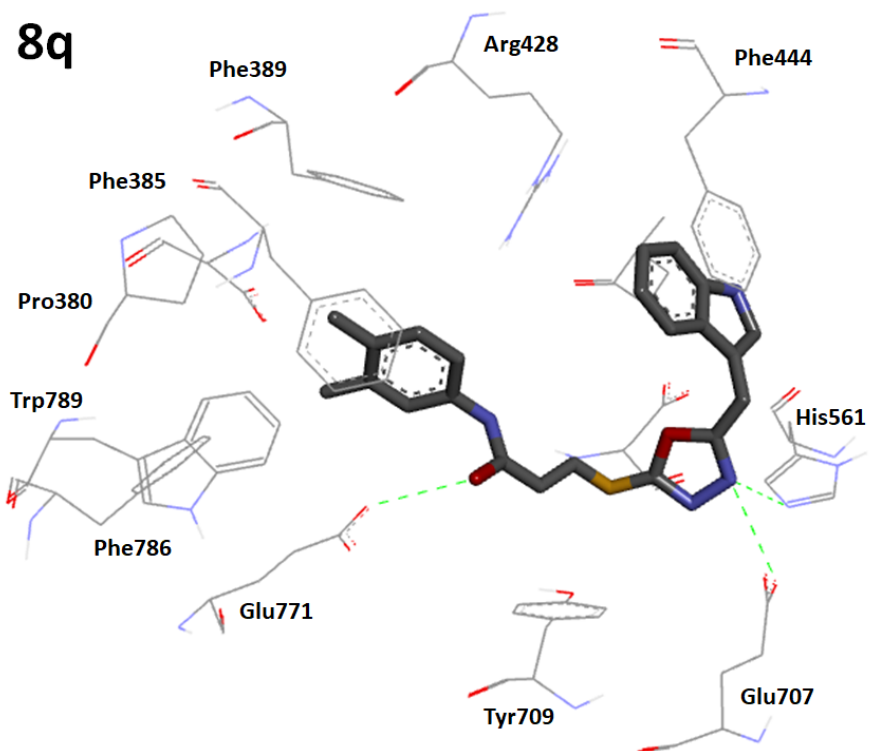

**Figure S23:** Docking of **8q** with  $\alpha$ -glucosidase.



8r

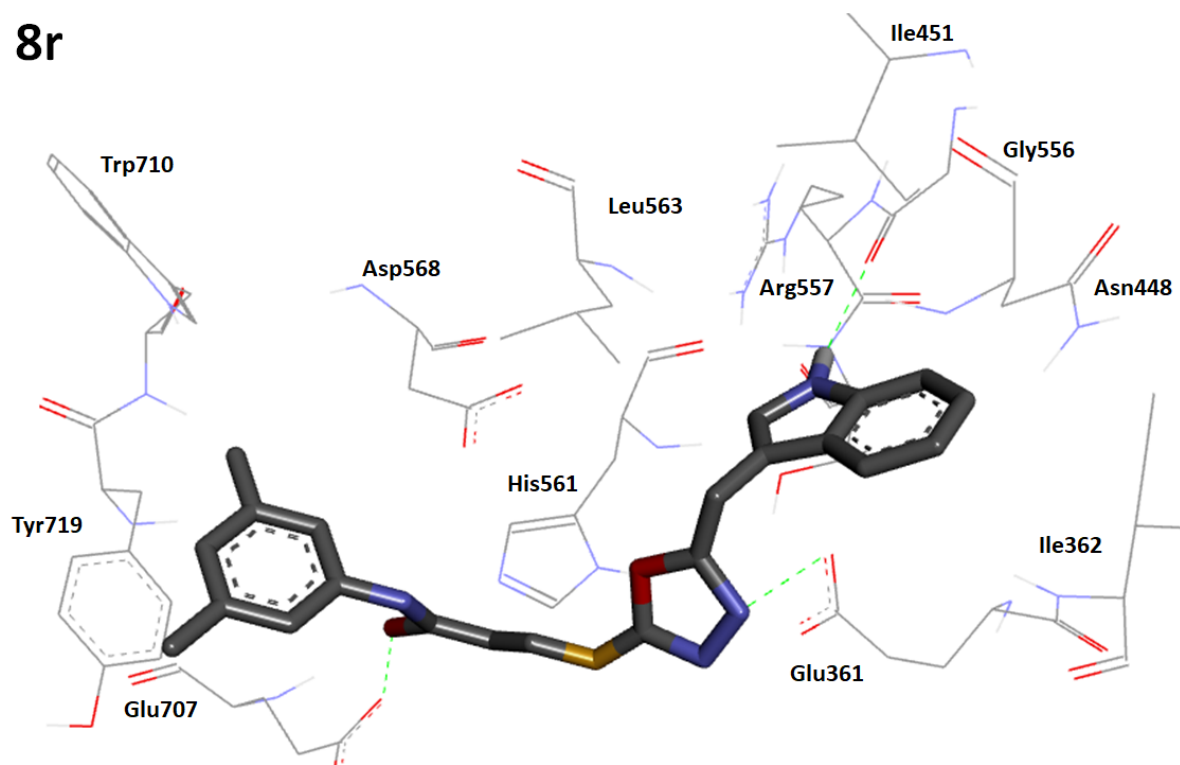

Figure S24: Docking of **8r** with  $\alpha$ -glucosidase.

8s

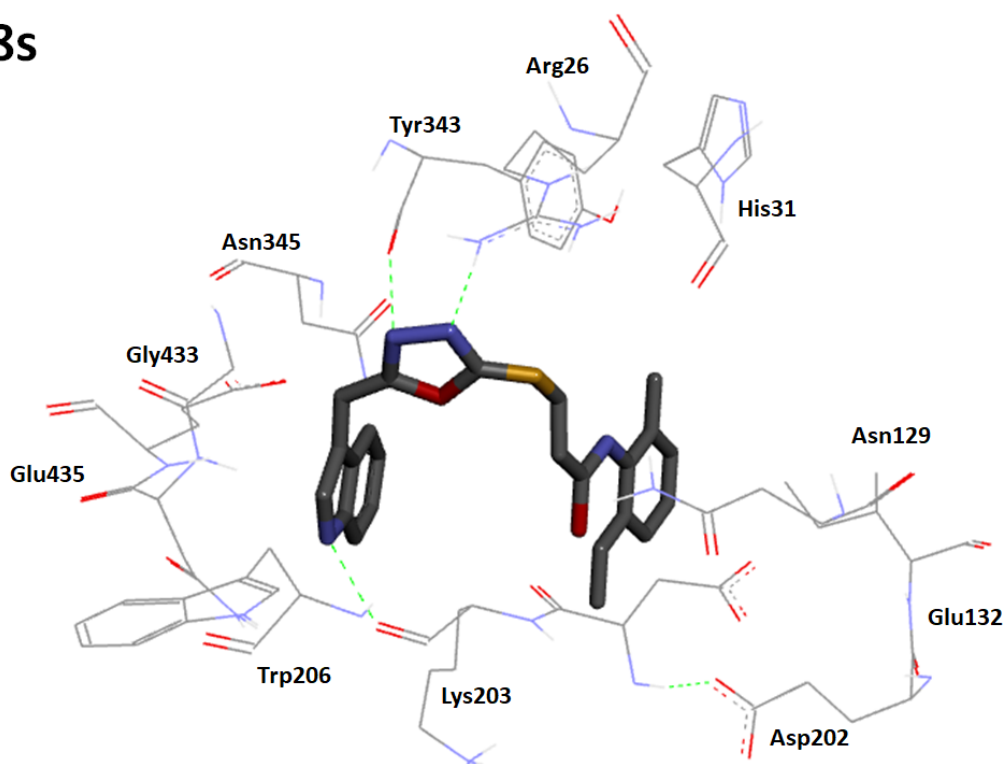

Figure S25: Docking of **8s** with  $\alpha$ -glucosidase.
